# Supplementary material for: Intratumoral Microbiota Changes with Tumor Stage and Influences the Immune Signature of Oral Squamous Cell Carcinoma
Source: PubMed Central journal article supplement (PMC10434029; doi:10.1128/spectrum.04596-22), 2023-07-06
Supplement: spectrum.04596-22-s0001.pdf [file spectrum.04596-22-s0001.pdf]

## 1 Supplemental material

2

### 3 Microbiome data analysis characteristics

4 After quality filtering, 39.6 million sequences were obtained for subsequent analysis  
5 from 56 million paired-end raw reads with an average of 0.19-3.5 million reads per  
6 sample. The rarefaction plots for the number of observed species, phylogenetic  
7 diversity, Shannon and Chao Indices reached a plateau for all the samples rarified for  
8 0.12 million sequences per sample (Supplementary Figure 1a). This plot indicates  
9 sufficient sequencing depth to cover the maximum microbiome diversity, richness, and  
10 observed species in each sample for further analysis (1, 2). A total of 21852 OTUs at  
11 the 97% sequence similarity were obtained, with 13,650 OTUs in pre-cancer 19502 in  
12 cancer and 7207 in the adjacent tumor group. The oral microbiome of the study was  
13 assigned to a total of 51 phyla and 1055 genera, of which the core microbiome that  
14 signifies taxa with the average relative abundance of equal to or more than 1% in any  
15 group was identified at each of the hierarchical levels as follows (a) Phyla: 10 out of 51  
16 (b) Genera: 50 out of 1055 (c) Species: 19 out of 67 identified from 10 genera having  
17 a relative abundance of more than 5%. The predominant phyla (top 5) belonged to  
18 *Firmicutes* (30.5%), *Proteobacteria* (27.3%), *Bacteroidetes* (12.8%) *Fusobacteria*  
19 (6.2%) and *Actinobacteria* (5.2%) while predominant genera (top 5) were  
20 *Streptococcus* (10.3%), *Capnocytophaga* (6.4%), unidentified genera of  
21 *Enterobacteriaceae* (5.4%), *Neisseria* (3.3%) and *Leptotrichia* (3.2%) in all samples  
22 combined (Supplementary table 1).

23 1. Mukherjee S, Mitra R, Maitra A, Gupta S, Kumaran S, Chakraborty A, Majumder PP.

24 2016. Sebum and Hydration Levels in Specific Regions of Human Face Significantly  
25 Predict the Nature and Diversity of Facial Skin Microbiome. *Sci Rep* 6:36062.

26 2. Willis AD. 2019. Rarefaction, Alpha Diversity, and Statistics. *Front Microbiol* 10:2407.

27

28

29

30

31 Supplemental figures:

32

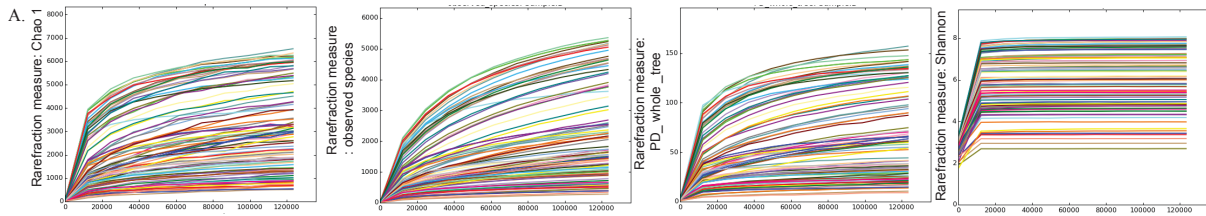

33 B.

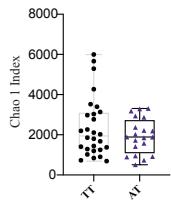

34 C.

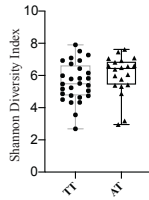

35 D.

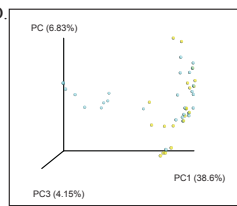

36 E.

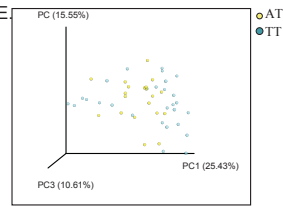

37

38

39

40

41

42

43

44

45

46

47

48

49

50

**Supplemental figure 1:** (A) Rarefaction analysis of 16S rRNA gene sequence obtained in present data set by four measures: Chao1, observed species, PD whole tree and Shannon indices. Bacterial alpha diversity indices among tumor tissue and adjacent tumor tissue samples measured by (B) Chao1 and (C) Shannon diversity indices. Statistical analysis was done by t-test, Mann-Whitney test. Bacterial beta diversity indices between tumor tissue and adjacent tumor tissue samples measured by (D) unweighted UniFrac distance (E) weighted UniFrac distance.

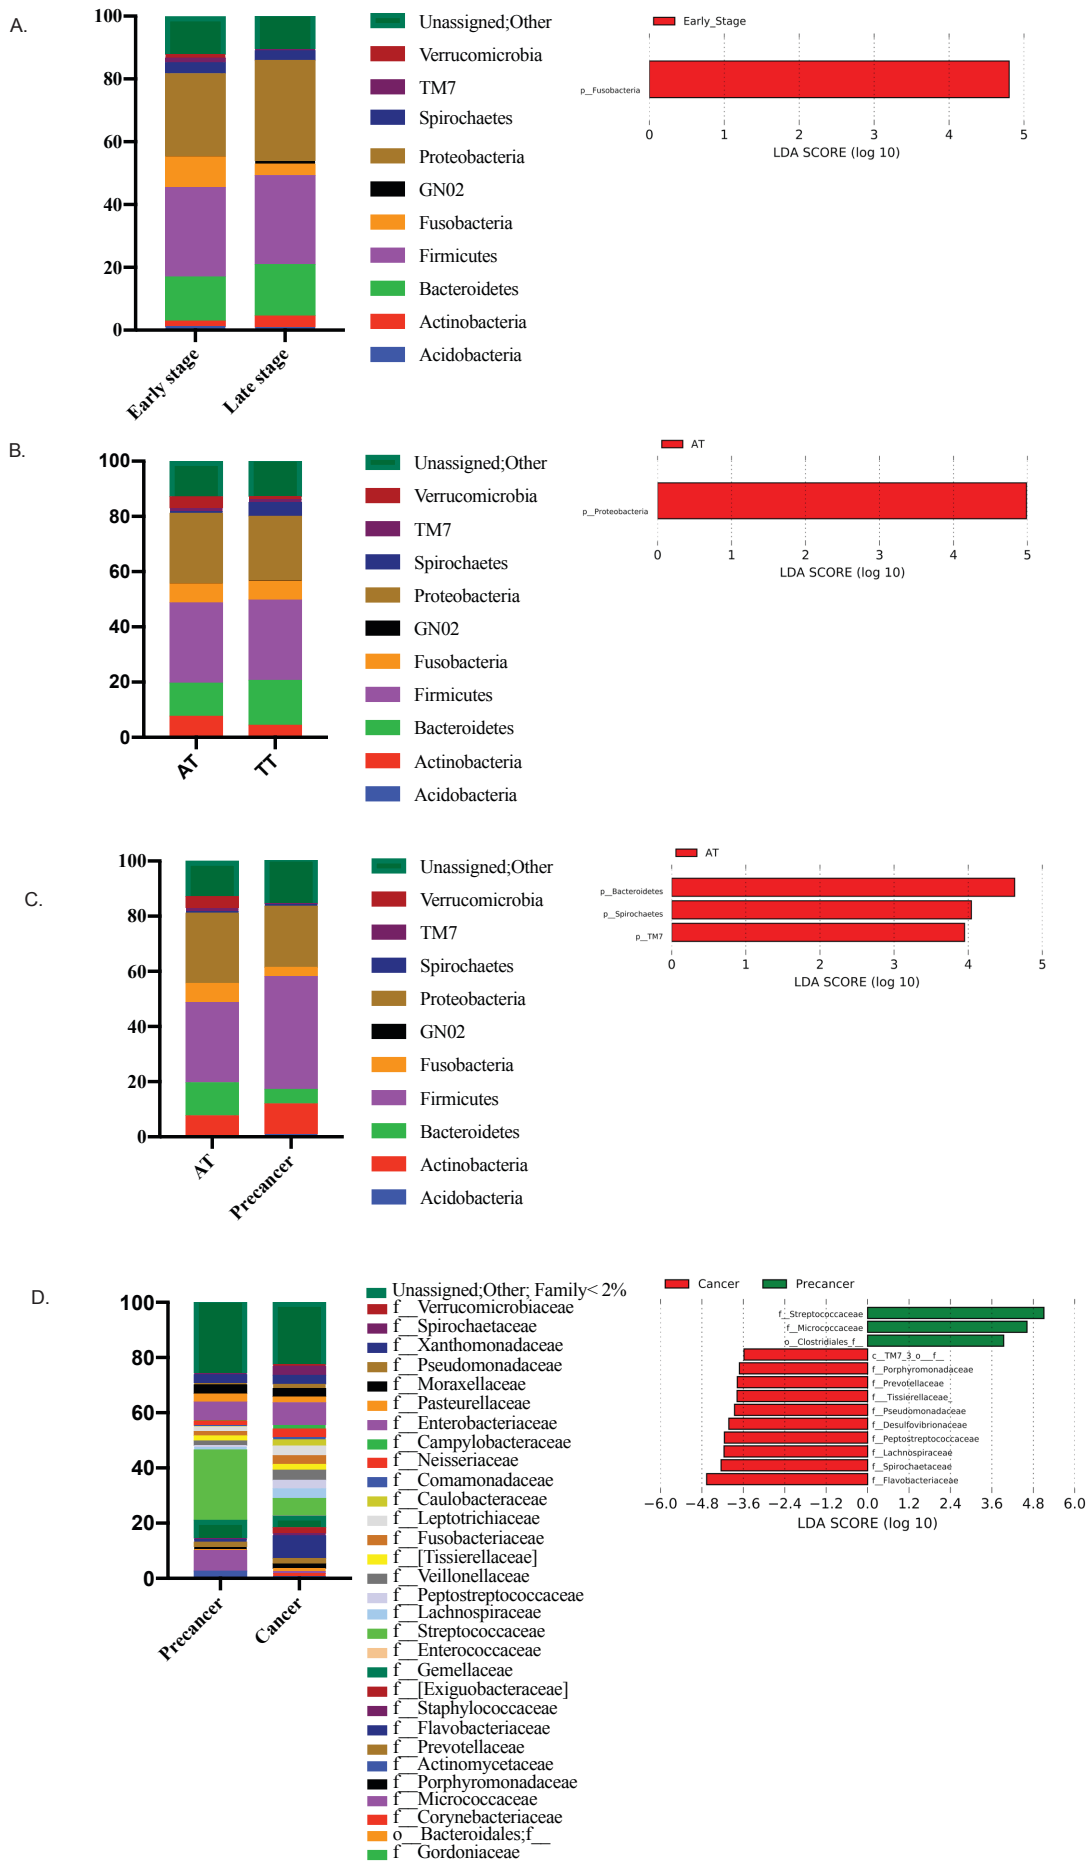

52 **Supplemental figure 2:** (A) Relative and differential abundances of core bacterial phyla among early  
53 (T1 and T2) and late stages (T3 and T4) of cancer groups. (B) Relative and differential abundances of  
54 core bacterial phyla among adjacent tumor tissue and tumor tissues. (C) Relative and differential  
55 abundances of core bacterial phyla among adjacent tumor tissue and pre-cancer stage. (D) Relative  
56 and differential abundances of bacteria at family level among pre-cancer and cancer groups. Differential  
57 abundance analysis was done by LEfSe and represented through LDA plot.

58

59

60

61

62

63

64

65

66

67

68

69

70

71

72

73

74

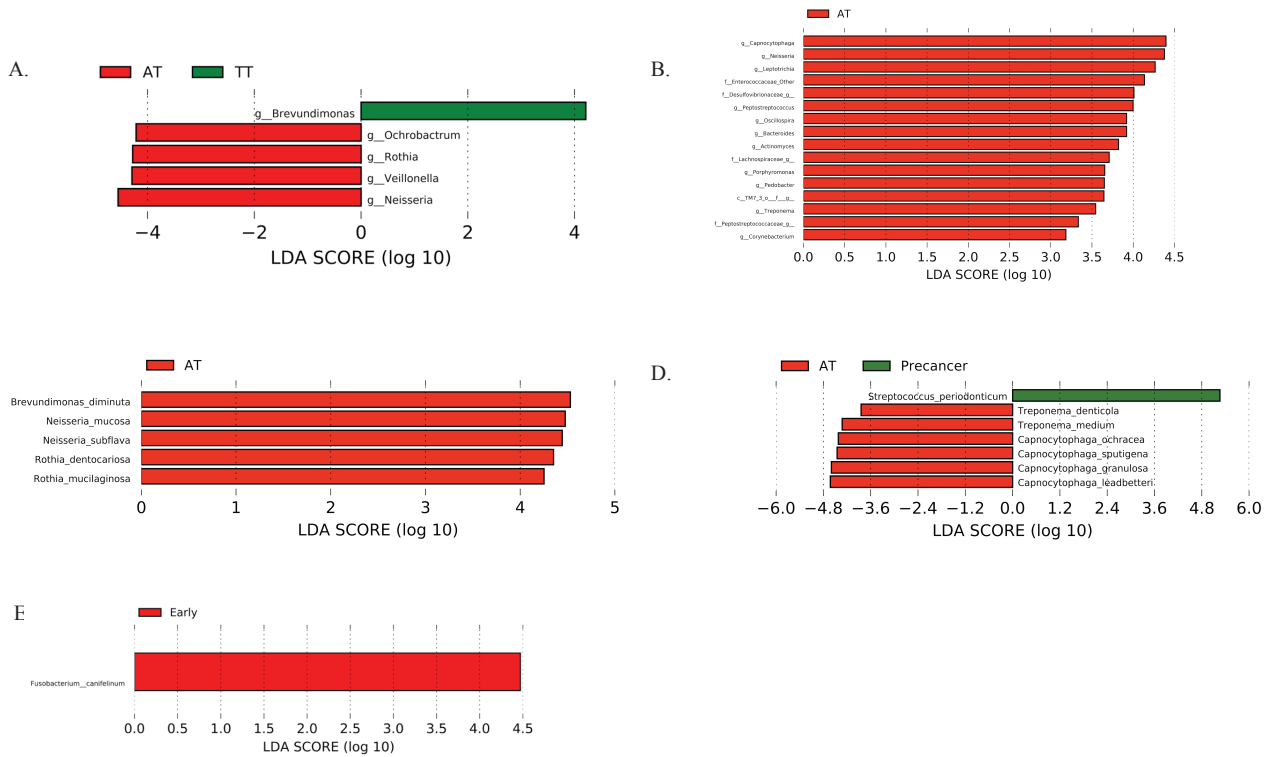

75  
76  
77  
78  
79  
80  
81  
82  
83  
84  
85  
86  
87  
88  
89  
90  
91  
92  
93

**Supplemental figure 3:** Differential abundances of core bacterial genera among (A) adjacent tumor tissue (AT) and tumor tissues (TT). (B) pre-cancer and adjacent tumor tissue. Differential abundances of bacteria at species level among adjacent tumor tissue (AT) and (C) tumor tissue (TT) (D) and pre-cancer groups. (E) Differential abundances of bacteria at species level between early (T1 and T2) and late cancer stage (T3 and T4) groups. Differential abundance analysis was done by LEfSe and represented through LDA plot.

A.

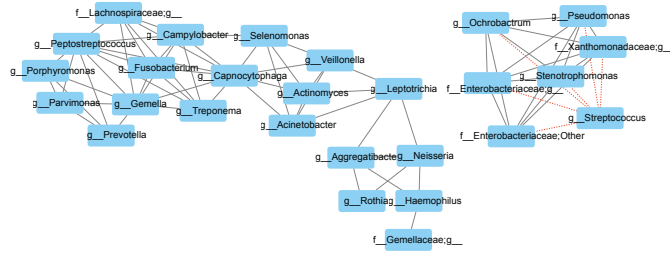

B.

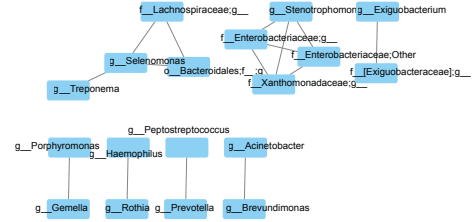

94  
95

96 **Supplemental figure 4: Co-occurrence analysis.** Co-occurrence analysis of top 30 bacterial genera  
 97 in (A) pre-cancer and (B) cancer groups with Pearson's correlation analysis presented through network  
 98 analysis. Black line: positive interaction; red dotted line: negative interaction.

99  
100  
101  
102  
103  
104  
105  
106  
107  
108  
109  
110  
111  
112  
113  
114  
115  
116

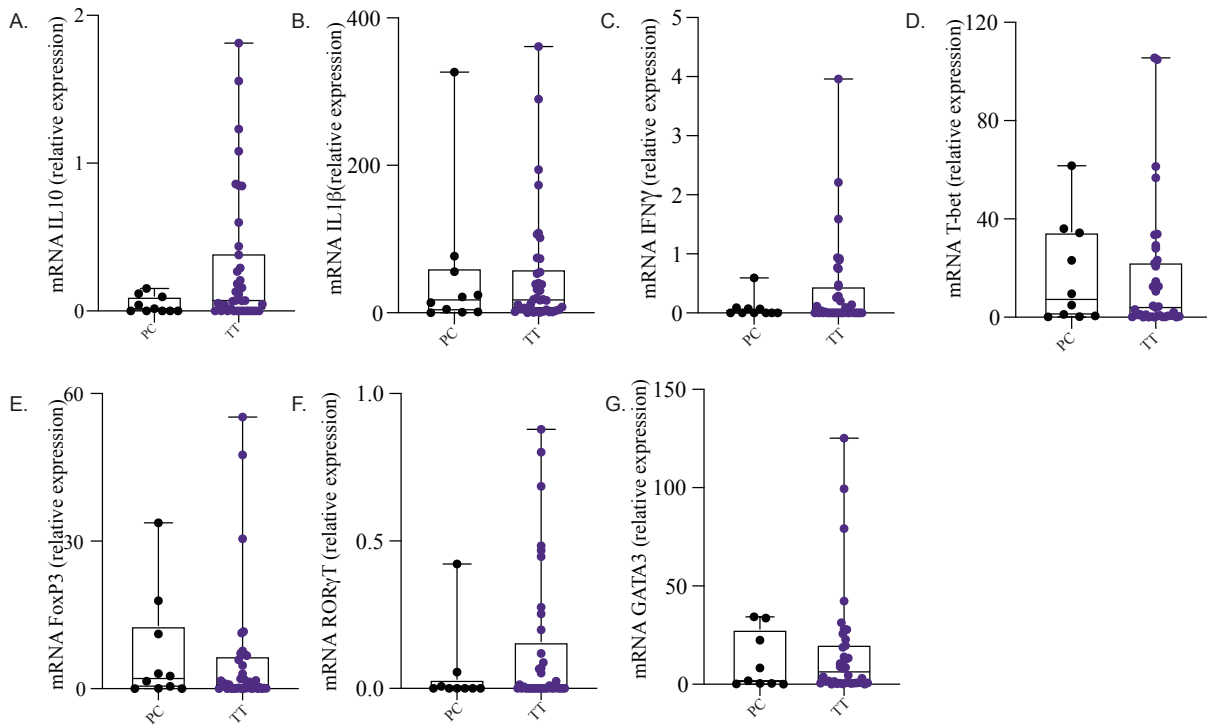

117

118 **Supplemental figure 5:** Relative expression of cytokine genes and T cell associated genes in pre-  
 119 cancer and cancer group (A) *IL10* (B) *IL1β* (C) *IFNγ* (D) *T-bet* (T<sub>H1</sub>) (E) *FoxP3* (Treg) (F) *RORγT* (T<sub>H17</sub>)  
 120 (G) *GATA3* (T<sub>H2</sub>). n=10 (Pre-cancer group); n=40 (Cancer group). Statistical analysis was done t-test  
 121 followed by Mann-Whitney test. PC: pre-cancer, TT-tumor tissue

122

123

124

125

126

127

128

129

130

131

132

133

134

135 **Supplemental table 2:** Dominant species having more than 2% of relative abundance.

136

| Species                             | Relative abundances |
|-------------------------------------|---------------------|
| <i>Rothia__mucilaginosa</i>         | 6.169               |
| <i>Capnocytophaga__granulosa</i>    | 3.464               |
| <i>Capnocytophaga__leadbetteri</i>  | 7.468               |
| <i>Capnocytophaga__ochracea</i>     | 2.476               |
| <i>Capnocytophaga__sputigena</i>    | 5.868               |
| <i>Exiguobacterium__aurantiacum</i> | 2.568               |
| <i>Streptococcus__dysgalactiae</i>  | 2.992               |
| <i>Streptococcus__periodonticum</i> | 21.652              |
| <i>Fusobacterium__nucleatum</i>     | 7.040               |
| <i>Brevundimonas__diminuta</i>      | 5.058               |
| <i>Neisseria__mucosa</i>            | 4.865               |
| <i>Neisseria__subflava</i>          | 3.158               |
| <i>Haemophilus__parainfluenzae</i>  | 5.236               |
| <i>Treponema__medium</i>            | 3.525               |
| <i>Akkermansia__muciniphila</i>     | 3.672               |

137

138

139

140

141

142

143

144

145

146

147

148

149

150

151

152

153



154 **Supplemental table 3:** Summary of the area under ROC curve (AUC) indices using  
155 differential genus in precancer and cancer samples.

156

| <b>Predictive Genus</b> | <b>AUC</b> | <b>95% CI</b>   | <b>P value</b> |
|-------------------------|------------|-----------------|----------------|
| <i>Streptococcus</i>    | 0.7874     | 0.6501 - 0.9246 | 0.0006         |
| <i>Rothia</i>           | 0.7529     | 0.6267 - 0.8791 | 0.0027         |
| <i>Capnocytophaga</i>   | 0.8103     | 0.6964 - 0.9243 | 0.0002         |
| <i>Treponema</i>        | 0.7092     | 0.5758 - 0.8425 | 0.0130         |
| <i>Leptotrichia</i>     | 0.6782     | 0.5260 - 0.8303 | 0.0343         |

157 95% CI;95% confidence interval

158

159

160

161

162

163

164

165

166

167

168

169

170

171

172 **Supplemental table 4 -Significantly correlated TILs with most abundant genera**  
 173 **of tumour microenvironment.**

174

| <b>Tumour infiltrating lymphocytes</b> | <b>Genus</b>           | <b>Pearson correlation coefficient (r)</b> | <b>P value</b> |
|----------------------------------------|------------------------|--------------------------------------------|----------------|
| CD19                                   | <i>Porphyromonas</i>   | 0.5847                                     | 0.0043         |
|                                        | <i>Streptococcus</i>   | 0.4902                                     | 0.0205         |
|                                        | <i>Oscillospira</i>    | 0.4607                                     | 0.031          |
|                                        | <i>Aggregatibacter</i> | 0.4717                                     | 0.0267         |
| CD 4                                   | <i>Brevundimonas</i>   | 0.4939                                     | 0.0372         |
| CD 4 Naive                             | <i>Rothia</i>          | 0.6261                                     | 0.0294         |
|                                        | <i>Porphyromonas</i>   | 0.8424                                     | 0.0006         |
|                                        | <i>Prevotella</i>      | 0.5869                                     | 0.0449         |
|                                        | <i>Gemellaceae;g__</i> | 0.833                                      | 0.0008         |
|                                        | <i>Streptococcus</i>   | 0.6721                                     | 0.0167         |
|                                        | <i>Oscillospira</i>    | 0.6423                                     | 0.0243         |
|                                        | <i>Aggregatibacter</i> | 0.6193                                     | 0.0318         |
| CD 4 CM                                | <i>Porphyromonas</i>   | 0.7811                                     | 0.0027         |
|                                        | <i>Prevotella</i>      | 0.7172                                     | 0.0087         |
|                                        | <i>Gemellaceae;g__</i> | 0.62                                       | 0.0315         |
|                                        | <i>Oscillospira</i>    | 0.5767                                     | 0.0496         |
| CD 4 TEMRA                             | <i>Fusobacterium</i>   | 0.8277                                     | 0.0009         |
|                                        | <i>Leptotrichia</i>    | 0.7631                                     | 0.0039         |
|                                        | <i>Capnocytophaga</i>  | 0.7192                                     | 0.0084         |
|                                        | <i>c__BD1-5;o</i>      | 0.9427                                     | <0.0001        |
| CD 4 EM                                | <i>Porphyromonas</i>   | -0.6775                                    | 0.0155         |
|                                        | <i>Prevotella</i>      | -0.647                                     | 0.023          |

|            |                          |         |        |
|------------|--------------------------|---------|--------|
|            | <i>Exiguobacterium</i>   | 0.6118  | 0.0345 |
|            | <i>Gemellaceae;g__</i>   | -0.6679 | 0.0176 |
|            | <i>Fusobacterium</i>     | -0.6682 | 0.0175 |
|            | <i>Campylobacter</i>     | -0.8084 | 0.0015 |
| CD 8 Naïve | <i>Porphyromonas</i>     | 0.7569  | 0.0044 |
|            | <i>F_Gemellaceae;g__</i> | 0.8362  | 0.0007 |
|            | <i>Gemella</i>           | 0.6605  | 0.0194 |
|            | <i>Streptococcus</i>     | 0.8303  | 0.0008 |
| CD 8CM     | <i>Campylobacter</i>     | 0.5851  | 0.0457 |
| CD 8 TEMRA | <i>Pedobacter</i>        | 0.6351  | 0.0265 |
|            | <i>Leptotrichia</i>      | -0.58   | 0.0481 |
|            | <i>Capnocytophaga</i>    | -0.5694 | 0.0533 |
| CD 8 EM    | <i>Porphyromonas</i>     | -0.6252 | 0.0297 |
|            | <i>F_Gemellaceae;g__</i> | -0.6108 | 0.0349 |
|            | <i>Gemella</i>           | -0.6287 | 0.0285 |
|            | <i>Streptococcus</i>     | -0.7388 | 0.0061 |

175 CM; Central memory; EM; Effector memory; TEMRA: Effector memory cell re-expressing CD45RA

176

177 Tumour-infiltrating lymphocytes percentage value of flow cytometry data were correlated with relative  
178 abundances of intra-tumoral bacteria at genus level with Pearson's correlation parameter. Values with  
179 Pearson's co-relation coefficient (r) >0.5 and p value <0.05 are shown in the table.

180

181

182

183

184

185

186

187

188

189

190  
191

**Supplemental Table 5-** List of antibodies used in flowcytometry and IHC.

| Antibody          | Clone  | Sources        |
|-------------------|--------|----------------|
| CD 19-FITC        | HIB19  | BD Biosciences |
| CD 3-PERCP        | SK7    | BD Biosciences |
| CD 4-FITC         | RPA-T4 | BD Biosciences |
| CD 8-PE           | RPA-T8 | BD Biosciences |
| CD 45RA-APC       | HI100  | BD Biosciences |
| CD 45RO-APC H7    | UCHL1  | eBioscience    |
| CCR7- PE-Cyanine7 | 3D12   | eBioscience    |
| CD24-PE           | ML5    | BD Biosciences |
| CD27-PECY7        | M-T271 | BD Biosciences |
| CD38-APC          | HIT2   | BD Biosciences |
| CD20cy            | L26    | Dako           |
| CD3               | -      | Dako           |
| IgA               | -      | Dako           |

192  
193  
194  
195  
196  
197  
198  
199  
200  
201  
202  
203  
204  
205  
206  
207  
208  
209  
210  
211  
212  
213  
214  
215  
216  
217  
218  
219  
220  
221  
222  
223  
224  
225  
226  
227  
228

229 **Supplemental Table 6 - Primers used for RT- qPCR.**

230

| Gene name      | Primer sequence          |
|----------------|--------------------------|
| IL-1 $\beta$   | CGCCAATGACTCAGAGGAAG     |
|                | AGGGCGTCATTCAGGATCAA     |
| IL 6           | GTAGCCGCCCCACACAGACAGCC  |
|                | GCCATCTTTGGAAGGTTT       |
| IFN $\gamma$   | TCAGCTCTGCATCGTTTTGG     |
|                | GTTCCATTATCCGCTACATCTGAA |
| TNF $\alpha$   | TCTTCTCGAACCCCGAGTGA     |
|                | CCTCTGATGGCACCACCAG      |
| IL 10          | GTGATGCCCCAAGCTGAGA      |
|                | CACGGCCTTGCTCTTGTTTT     |
| TGF- $\beta$   | CAGCAACAATTCCTGGCGATA    |
|                | AAGGCGAAAGCCCTCAATTT     |
| T-bet          | CCCCTTGGTGTGGACTGAGA     |
|                | ACGCGCCTCCTCTTAGAGTC     |
| GATA-3         | GTCTCCCTGAGCCACATCT      |
|                | GTGGTCCAAGGACAGGCTG      |
| ROR $\gamma$ t | CGCTCCAACATCTTCTCC       |
|                | CTAACCAGCACCCTTCC        |
| Foxp3          | CAGCCATGATCAGCCTCACA     |
|                | GCACTGGGATTTGGGAAGGT     |
| GAPDH          | CCTGCACCACCAACTGCTTA     |
|                | GGCCATCCACAGTCTTCTGAG    |

231
